# Supplementary material
Source: HighWire-hosted journal article supplement (https://qualitysafety.bmj.com/highwire/filestream/147755/field_highwire_adjunct_files/1/bmjqs-2015-004188supp_tables.pdf)
Supplement: bmjqs-2015-004188supp_tables.pdf [file bmjqs-2015-004188supp_tables.pdf]

**Supplemental Table 1. Other Quality Indicators Pre-I vs. Post-I**

|                               | Intervention sites       |                                  | Control sites            |                                 | Ratio of ORs      |
|-------------------------------|--------------------------|----------------------------------|--------------------------|---------------------------------|-------------------|
|                               | Pre-<br>Post-            | OR (95%<br>CI); p-<br>value      | Pre-<br>Post-            | OR (95%<br>CI); p-value         |                   |
| <b>Other quality outcomes</b> |                          |                                  |                          |                                 |                   |
| tPA                           | 4 (50.0)<br>8 (80.0)     | 4.00 (0.50-<br>31.98);<br>0.1912 | 4 (44.4)<br>4 (44.4)     | 1.00 (0.16-<br>6.42);<br>1.0000 | 4.00;<br>p=0.3300 |
| NIHSS                         | 210 (45.7)<br>233 (50.2) | 1.20 (0.92-<br>1.56);<br>0.1714  | 141 (39.7)<br>215 (46.8) | 1.34 (1.01-<br>1.78);<br>0.0442 | 0.90;<br>p=0.5843 |
| AC by HD2                     | 360 (87.4)<br>379 (88.3) | 1.09 (0.72-<br>1.66);<br>0.6711  | 277 (87.7)<br>373 (91.0) | 1.42 (0.88-<br>2.28);<br>0.1480 | 0.77;<br>p=0.4213 |
| Considered for rehab          | 402 (91.6)<br>395 (89.6) | 0.79 (0.50-<br>1.25);<br>0.3118  | 300 (87.0)<br>382 (87.4) | 1.04 (0.68-<br>1.60);<br>0.8518 | 0.76;<br>p=0.3875 |
| AC at DC                      | 403 (97.6)<br>420 (97.7) | 1.04 (0.43-<br>2.53);<br>0.9271  | 314 (96.9)<br>404 (98.8) | 2.57 (0.87-<br>7.59);<br>0.0869 | 0.40;<br>p=0.2052 |
| Cholesterol med               | 312 (91.5)<br>335 (93.3) | 1.30 (0.74-<br>2.28);<br>0.3654  | 263 (93.3)<br>312 (91.8) | 0.81 (0.44-<br>1.48);<br>0.4840 | 1.60;<br>p=0.2590 |
| AC for AF                     | 28 (70.0)<br>42 (82.4)   | 2.00 (0.75-<br>5.36);<br>0.1685  | 42 (79.3)<br>49 (77.8)   | 0.92 (0.38-<br>2.23);<br>0.8478 | 2.17;<br>p=0.2495 |
| Stroke education              | 118 (41.3)<br>160 (50.6) | 1.24 (0.96-<br>1.60);<br>0.1011  | 34 (17.8)<br>52 (19.9)   | 1.14 (0.71-<br>1.84);<br>0.5815 | 1.09;<br>p=0.4044 |
| Smoking cessation counseling  | 166 (91.2)<br>172 (95.0) | 1.84 (0.79-<br>4.27);<br>0.1548  | 107 (85.6)<br>150 (90.9) | 1.68 (0.81-<br>3.50);<br>0.1641 | 1.10;<br>p=0.8734 |

**Supplemental Table 2. Models of Composite quality and defect-free care scores**

| <b>Active-I vs. Pre-I</b> |                                                  |                  |                                                   |                  |
|---------------------------|--------------------------------------------------|------------------|---------------------------------------------------|------------------|
|                           | <b>Overall composite score</b><br>(linear model) |                  | <b>Defect-free care score</b><br>(logistic model) |                  |
|                           | $\beta$ (SE)                                     | p                | OR (95% CI)                                       | p                |
| Time (Active-I vs. pre-I) | <b>0.0165 (.014)</b>                             | <b>&lt;0.001</b> | 1.41 (0.86-2.29)                                  | 0.17             |
| Intervention group        | 0.0010 (.012)                                    | 0.06             | 0.69 (0.34-1.40)                                  | 0.30             |
| Age                       | -0.0003 (.000)                                   | 0.53             | 1.00(0.98-1.02)                                   | 0.78             |
| Race (non-white)          | 0.0059 (.010)                                    | 0.53             | 0.77 (0.49-1.22)                                  | 0.27             |
| NIHSS                     | -0.0009 (.001)                                   | 0.28             | 1.03 (0.99-1.06)                                  | 0.16             |
| Data collection program   | -0.0400 (.023)                                   | 0.08             | 0.23 (0.02-2.84)                                  | 0.25             |
| Indicator at baseline*    | <b>0.0978 (.012)</b>                             | <b>&lt;0.001</b> | <b>6.57 (2.36-18.30)</b>                          | <b>&lt;0.001</b> |
| Time-group interaction    | 0.0354 (.019)                                    | 0.06             | 1.75(0.51-3.56)                                   | 0.55             |
| <b>Post-I vs. Pre-I</b>   |                                                  |                  |                                                   |                  |
|                           | <b>Overall composite score</b><br>(linear model) |                  | <b>Defect-free care score</b><br>(logistic model) |                  |
|                           | $\beta$ (SE)                                     | p                | OR (95% CI)                                       | p                |
| Time (post-I vs. pre-I)   | <b>0.044 (.012)</b>                              | <b>&lt;0.001</b> | <b>1.90 (1.32-2.73)</b>                           | <b>&lt;0.001</b> |
| Intervention group        | 0.007 (.018)                                     | 0.70             | 1.26 (0.80-1.99)                                  | 0.31             |
| Age                       | -0.000 (.000)                                    | 0.39             | 1.00 (0.99-1.02)                                  | 0.87             |
| Race (non-white)          | 0.007 (.009)                                     | 0.39             | 0.83 (0.59-1.18)                                  | 0.30             |
| NIHSS                     | -0.001 (.001)                                    | 0.22             | 1.02 (0.99-1.04)                                  | 0.18             |
| Data collection program   | 0.005 (.037)                                     | 0.90             | <b>2.48 (1.08-5.68)</b>                           | <b>0.03</b>      |
| Indicator at baseline*    | <b>0.069 (.021)</b>                              | <b>&lt;0.001</b> | <b>1.67 (1.22-2.29)</b>                           | <b>0.01</b>      |
| Time-group interaction    | -0.001 (.016)                                    | 0.95             | 0.75 (0.36-1.55)                                  | 0.44             |

\*10% increment

**Supplemental Table 3: INSPIRE study Template for Intervention Description and Replication (TIDieR)<sup>1</sup> Checklist**

|                                |                                                                                                                                                                                                                                                                                                                                                                                                                                                                                                                                                                                                                                                                                                                                                                                                                                                                                                                                                                                                                                                                                                                                                      |
|--------------------------------|------------------------------------------------------------------------------------------------------------------------------------------------------------------------------------------------------------------------------------------------------------------------------------------------------------------------------------------------------------------------------------------------------------------------------------------------------------------------------------------------------------------------------------------------------------------------------------------------------------------------------------------------------------------------------------------------------------------------------------------------------------------------------------------------------------------------------------------------------------------------------------------------------------------------------------------------------------------------------------------------------------------------------------------------------------------------------------------------------------------------------------------------------|
| Brief name of the intervention | Operational systems engineering training in a collaborative format plus monthly performance feedback                                                                                                                                                                                                                                                                                                                                                                                                                                                                                                                                                                                                                                                                                                                                                                                                                                                                                                                                                                                                                                                 |
| Why                            | Quality improvement training that incorporates operational systems engineering/LEAN methods and collaborative-style interventions have been used widely by the VHA in its Systems Redesign organizational office, and have been shown to be effective in improving processes of care.                                                                                                                                                                                                                                                                                                                                                                                                                                                                                                                                                                                                                                                                                                                                                                                                                                                                |
| What                           | <p>Quality improvement training included:</p> <ol style="list-style-type: none"> <li>1. Introduction to collaboratives and Systems Redesign</li> <li>2. Engaging Leadership</li> <li>3. Building effective LEAN healthcare teams</li> <li>4. Voice of the Customer Analysis</li> <li>5. Review of stroke quality indicators</li> <li>6. Review of each facilities baseline data (FY 2007 OQP Stroke Special Study)</li> <li>7. Setting a project charter</li> <li>8. Process mapping and measurement</li> <li>9. LEAN Hands-on Exercise</li> <li>10. Breakout session 1: Create specific process flow maps for DVT and Dysphagia indicators</li> <li>11. LEAN tools to design the future state</li> <li>12. 5S, visual controls, setup reduction</li> <li>13. Future state process mapping</li> <li>14. Breakout session 2: Create specific future state maps for DVT and Dysphagia indicators</li> <li>15. Using tools in the electronic health record to improve practice: Clinical Applications Coordinator Experience</li> <li>16. Breakout session 3: Brainstorm solutions, create impact/effort matrix, develop initial PDSA cycles</li> </ol> |
| Who provided                   | VHA industrial engineers engaged in Systems Redesign activities system-wide and implementation researchers from the VHA Stroke Quality Enhancement Research Initiative group. Each site in the intervention was assigned two “coaches,” one engineer and one implementation researcher. Calls and site visits were conducted jointly by these two coaches.                                                                                                                                                                                                                                                                                                                                                                                                                                                                                                                                                                                                                                                                                                                                                                                           |
| How                            | <ul style="list-style-type: none"> <li>• Two Pre-Collaborative Sessions by Webinar (covering training items 1-7)</li> <li>• In-person collaborative (training items 8-16)</li> <li>• Monthly post-collaborative telephone calls with each site individually for 6 months</li> <li>• One on-site visit for each site 1-2 months post-collaborative</li> <li>• Additional telephone calls and one additional on-site visit as needed during the 6 month post-collaborative period</li> <li>• Monthly written performance indicator feedback of site</li> </ul>                                                                                                                                                                                                                                                                                                                                                                                                                                                                                                                                                                                         |

|                   |                                                                                                                                                                                                                                                                                                                                                                                                                                           |
|-------------------|-------------------------------------------------------------------------------------------------------------------------------------------------------------------------------------------------------------------------------------------------------------------------------------------------------------------------------------------------------------------------------------------------------------------------------------------|
|                   | <p>specific data for 18 months</p> <ul style="list-style-type: none"> <li>Quarterly blinded data reports on performance for all sites for 18 months</li> </ul>                                                                                                                                                                                                                                                                            |
| Where             | <p>The collaborative was held at a hotel in a central location (Indianapolis, IN)</p> <p>On-site visits occurred at each intervention hospital</p>                                                                                                                                                                                                                                                                                        |
| When and How Much | <ul style="list-style-type: none"> <li>90 minute Pre-Collaborative Webinars</li> <li>2 ½ day In-person Collaborative</li> <li>Approximately 30 minute monthly phone calls</li> <li>1-day on-site visit for each site</li> </ul>                                                                                                                                                                                                           |
| Tailoring         | <p>Each site tailored the specific PDSA cycles to their individually generated process maps and chosen solutions. Each site monitored and modified their PDSA cycles throughout the 6 months post-collaborative. Sites shared solutions with other sites during the two quarterly post-collaborative telephone calls, and the engineer/implementation coaches also could suggest solutions during telephone calls and on-site visits.</p> |
| Modifications     | <p>The overall plan of the intervention was not modified. The timing for sending back performance reports varied somewhat from the designed monthly intervals due to occasional delays in sites sending the administrative data reports identifying stroke admissions from the prior month.</p>                                                                                                                                           |
| How well—Planned  | <p>Site participation in the post-collaborative calls was monitored, and the number of calls and emails made by sites to the coaches was tracked. The number and completion of PDSA cycles was tracked at all sites.</p>                                                                                                                                                                                                                  |
| How well--Actual  | <p>Completion of post-collaborative calls by the coaches was tracked. All sites received at least one post-collaborative site visit and at least six coaching calls. Debriefs of the coaches regarding site visits and calls were held as part of weekly team meetings.</p>                                                                                                                                                               |

<sup>1</sup>Hoffmann TC, Glasziou PP, Boutron I, Milne R, Perera R, Moher D et al. Better reporting of interventions: template for intervention description and replication (TIDieR) checklist and guide. *BMJ* 2014;348:g1687 doi:10/1136.
